# Supplementary material for: Increasing Physical Activity in Mothers Using Video Exercise Groups and Exercise Mobile Apps: Randomized Controlled Trial
Source: PubMed Central journal article supplement (PMC5984277; doi:10.2196/jmir.9310), 2018-05-18
Supplement: jmir_v20i5e179_app4.pdf [file jmir_v20i5e179_app4.pdf]

## Multimedia Appendix 4

**Table 4.** Post hoc Sensitivity Analyses - differences across randomization arms in physical activity changes over 8 weeks for inactive mothers and all mothers

| Models                                                         | Inactive Mothers  |          |          | All Mothers       |          |          |
|----------------------------------------------------------------|-------------------|----------|----------|-------------------|----------|----------|
|                                                                | MVPA <sup>a</sup> | Vigorous | Moderate | MVPA <sup>a</sup> | Vigorous | Moderate |
| <b>Original Model<sup>b</sup></b>                              |                   |          |          |                   |          |          |
| Treatment Effect                                               | 50.0              | 19.0     | 9.7      | 42.2              | 13.2     | 13.8     |
| <i>P</i> value                                                 | .03               | .02      | .36      | .12               | .20      | .14      |
| <b>Model without time variable<sup>c</sup></b>                 |                   |          |          |                   |          |          |
| Treatment Effect                                               | 50.3              | 18.5     | 11.0     | 41.5              | 11.9     | 15.6     |
| <i>P</i> value                                                 | .03               | .03      | .27      | .11               | .25      | .09      |
| <b>Model with total children variable<sup>d</sup></b>          |                   |          |          |                   |          |          |
| Treatment Effect                                               | 41.4              | 16.1     | 8.3      | 41.8              | 13.7     | 12.5     |
| <i>P</i> value                                                 | .06               | .04      | .42      | .12               | .19      | .18      |
| <b>Model imputing missings assuming no change<sup>e</sup></b>  |                   |          |          |                   |          |          |
| Treatment Effect                                               | 51.3              | 17.9     | 14.4     | 41.5              | 12.4     | 16.9     |
| <i>P</i> value                                                 | .02               | .02      | .17      | .11               | .20      | .07      |
| <b>Model imputing missings assuming worst case<sup>f</sup></b> |                   |          |          |                   |          |          |
| Treatment Effect                                               | 44.2              | 15.5     | 9.7      | 33.3              | 9.1      | 12.6     |
| <i>P</i> value                                                 | .049              | .047     | .34      | .20               | .36      | .17      |

<sup>a</sup>MVPA: moderate to vigorous physical activity

<sup>b</sup>Original model, adjusted for outcome value at baseline and exercise time slot, for inactive (n=51) and all (n=61) mothers

<sup>c</sup>Model with no time variable, adjusted for outcome value at baseline for inactive (n=51) and all (n=61) mothers

<sup>d</sup>Model with 'total children' variable added to model, adjusted for baseline value of outcome and exercise time slot, for inactive (n=51) and all (n=61) mothers

<sup>e</sup>Model imputing missing values assuming no change where all missing 8 week estimates (n=3) are equal to baseline estimates, adjusted for outcome value at baseline and exercise time slot for inactive (n=54) and all (n=64) mothers

<sup>f</sup>Model assuming worst case where all missing values for intervention (n=1) are equal to mean difference in the intervention arm minus 1 standard deviation and missing values for control (n=2) are equal to mean difference in control arm plus 1 standard deviation, adjusted for outcome value at baseline and exercise time slot for inactive (n=54) and all (n=64) mothers
